# Supplementary material for: A simple strategy to achieve remarkable mechanochromism of cationic Ir(iii) phosphors through subtle ligand modification
Source: Royal Society of Chemistry journal article supplement (doi:10.1039/c8tc03696a), 2018-01-01
Supplement: c8tc03696a1.pdf [file c8tc03696a1.pdf]

## Electronic Supplementary Information (ESI)

### **A simple strategy to achieve remarkable mechanochromism of cationic Ir(III) phosphors through subtle ligand modification**

Kai-Yue Zhao,<sup>a</sup> Hui-Ting Mao,<sup>a</sup> Li-Li Wen,<sup>a</sup> Guo-Gang Shan,<sup>\*a</sup> Qiang Fu,<sup>\*a</sup> Hai-Zhu Sun<sup>a</sup> and  
Zhong-Min Su<sup>\*ab</sup>

<sup>a</sup> *Institute of Functional Material Chemistry and National & Local United  
Engineering Lab for Power Battery, Faculty of chemistry, Northeast Normal  
University, Changchun, Jilin130024, P. R. China*

E-mail: [shangg187@nenu.edu.cn](mailto:shangg187@nenu.edu.cn) (G. G. Shan), [fuq863@nenu.edu.cn](mailto:fuq863@nenu.edu.cn) (Q. Fu),  
[zmsu@nenu.edu.cn](mailto:zmsu@nenu.edu.cn) (Z. M. Su).

<sup>b</sup> *School of Chemistry & Environmental Engineering, Changchun University of  
Science and Technology, Changchun, Jilin 130012, P. R. China*

## Table of Contents

|                                                                                                                                                                                                                                                                       |            |
|-----------------------------------------------------------------------------------------------------------------------------------------------------------------------------------------------------------------------------------------------------------------------|------------|
| 1. Synthetic routes and characteristic of ancillary ligands <b>L1-L4</b> .                                                                                                                                                                                            | <b>S3</b>  |
| 2. <sup>1</sup> H NMR and <sup>19</sup> F NMR spectra of <b>Ir-CzBr</b> , <b>Ir-Cz</b> , <b>Ir-CzMe</b> and <b>Ir-CzDMe</b> .                                                                                                                                         | <b>S4</b>  |
| 3. Emission spectra of <b>Ir-Cz</b> , <b>Ir-CzMe</b> and <b>Ir-CzDMe</b> in CH <sub>3</sub> CN-H <sub>2</sub> O mixtures with different H <sub>2</sub> O fractions (0–90%) at room temperature and their plots of relative PL intensities ( <i>I/I<sub>0</sub></i> ). | <b>S8</b>  |
| 4. Photophysical characteristics of <b>Ir-CzBr</b> , <b>Ir-Cz</b> , <b>Ir-CzMe</b> and <b>Ir-CzDMe</b> .                                                                                                                                                              | <b>S9</b>  |
| 5. Molecular orbital amplitude plots and energy levels of <b>Ir-Cz</b> , <b>Ir-CzMe</b> and <b>Ir-CzDMe</b> .                                                                                                                                                         | <b>S10</b> |
| 6. Emission spectra of <b>Ir-Cz</b> and <b>Ir-CzDMe</b> in various states at room temperature.                                                                                                                                                                        | <b>S10</b> |
| 7. Maximum emission wavelength changes of <b>Ir-CzBr</b> , <b>Ir-Cz</b> and <b>Ir-CzDMe</b> <i>versus</i> repeating cycles.                                                                                                                                           | <b>S11</b> |
| 8. Powder X-ray diffraction patterns of <b>Ir-CzBr</b> , <b>Ir-Cz</b> and <b>Ir-CzDMe</b> in various states.                                                                                                                                                          | <b>S12</b> |
| 9. Chemical structure of <b>Ir-CztBut</b> .                                                                                                                                                                                                                           | <b>S13</b> |
| 10. The emission spectrum of <b>Ir-CztBut</b> in powder at room temperature.                                                                                                                                                                                          | <b>S13</b> |
| 11. References.                                                                                                                                                                                                                                                       | <b>S13</b> |

## Synthetic routes and characteristic of ancillary ligands L1-L4

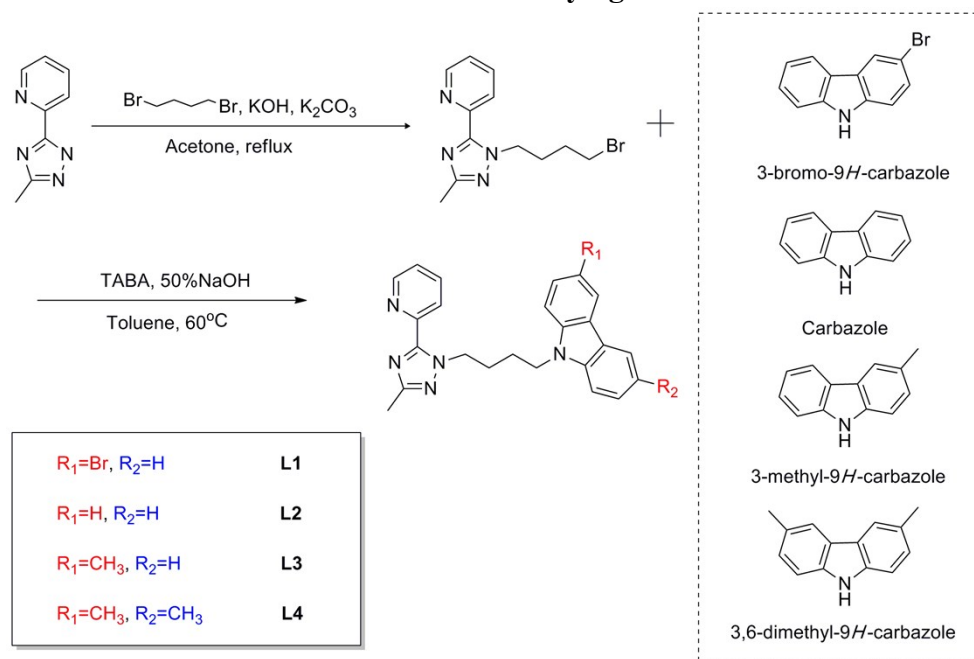

**Scheme S1** Synthetic routes of the ancillary ligands **L1-L4**.

Scheme S1 exhibits the synthetic routes of the ancillary ligands **L1-L4**. 2-(3-methyl-1*H*-1,2,4-triazol-5-yl)pyridine, the intermediate **Inter-1** and ancillary ligand **L2**, **L4** were synthesized according to the modified reported procedures.<sup>1,2</sup>

### **3-bromo-9-(4-(3-methyl-5-(pyridin-2-yl)-1*H*-1,2,4-triazol-1-yl)butyl)-9*H*-carbazole (L1).**

Compound **L1** was prepared according to the procedure described for **L2**. Yield: 66%. <sup>1</sup>H NMR (500 MHz, CDCl<sub>3</sub>, ppm):  $\delta$  8.53 (d,  $J = 4.5$  Hz, 1H), 8.14–8.17 (m, 2H), 8.01 (d,  $J = 7.5$  Hz, 1H), 7.80 (t,  $J = 7.5$  Hz, 1H), 7.44–7.50 (m, 2H), 7.37 (d,  $J = 8.5$  Hz, 2H), 7.29–7.31 (m, 1H), 7.21–7.26 (m, 2H), 4.78 (t,  $J = 7.0$  Hz, 2H), 4.30 (t,  $J = 7.0$  Hz, 2H), 2.44 (s, 3H), 1.93–2.05 (m, 2H), 1.88–1.91 (m, 2H). MS (ESI): calcd for [C<sub>24</sub>H<sub>22</sub>BrN<sub>5</sub>] ([M+H]<sup>+</sup>)  $m/z$  460.1137, found 460.1131. Anal. Calcd for C<sub>24</sub>H<sub>22</sub>BrN<sub>5</sub>: C, 62.61; H, 4.82; N, 15.21. Found: C, 62.54; H, 4.75; N, 15.29.

### **3-methyl-9-(4-(3-methyl-5-(pyridin-2-yl)-1*H*-1,2,4-triazol-1-yl)butyl)-9*H*-carbazole (L3).**

Compound **L3** was prepared according to the procedure described for **L2**. Yield: 68%. <sup>1</sup>H NMR (500 MHz, CDCl<sub>3</sub>, ppm):  $\delta$  8.52–8.55 (m, 1H), 8.15 (d,  $J = 7.5$  Hz, 1H), 8.04 (d,  $J = 7.5$  Hz, 1H), 7.88 (s, 1H), 7.78–7.81 (m, 1H), 7.40–7.42 (m, 1H), 7.34 (d,  $J = 8.5$  Hz, 1H), 7.29–7.31 (m, 2H), 7.24–7.28 (m, 2H), 7.17–7.20 (m, 1H), 4.75–4.80 (m,

2H), 4.26–4.33 (m, 2H), 2.52 (d,  $J = 7.0$  Hz, 3H), 2.44 (d,  $J = 3.5$  Hz, 3H), 1.95–2.01 (m, 2H), 1.88–1.93 (m, 2H). MS (ESI): calcd for  $[C_{24}H_{25}N_5]$  ( $[M+H]^+$ )  $m/z$  396.2188, found 396.2183. Anal. Calcd for  $C_{24}H_{25}N_5$ : C, 75.92; H, 6.37; N, 17.71. Found: C, 75.85; H, 6.23; N, 17.80.

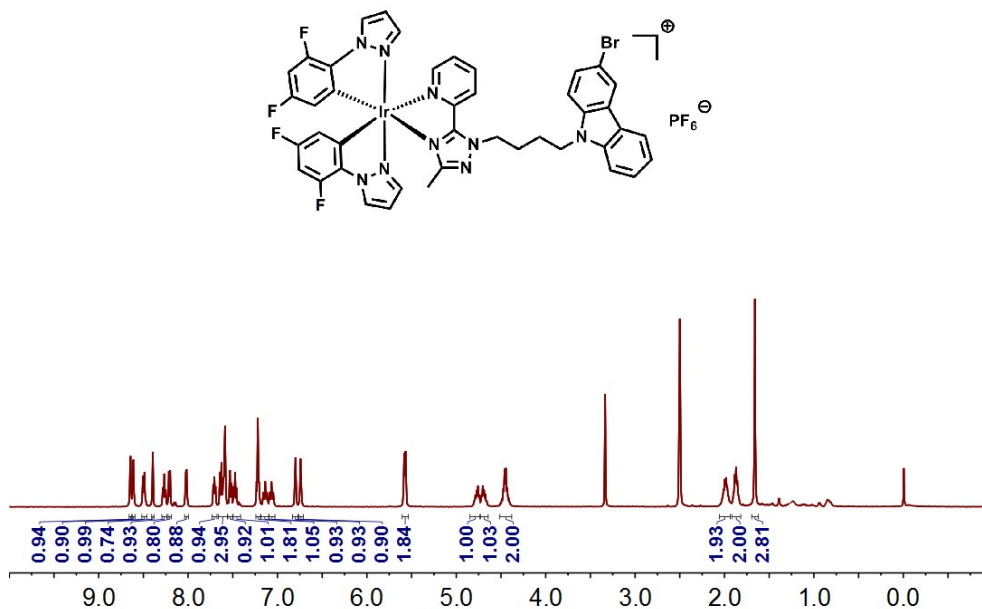

Fig. S1  $^1H$  NMR spectrum of **Ir-CzBr** in  $DMSO-d_6$ .

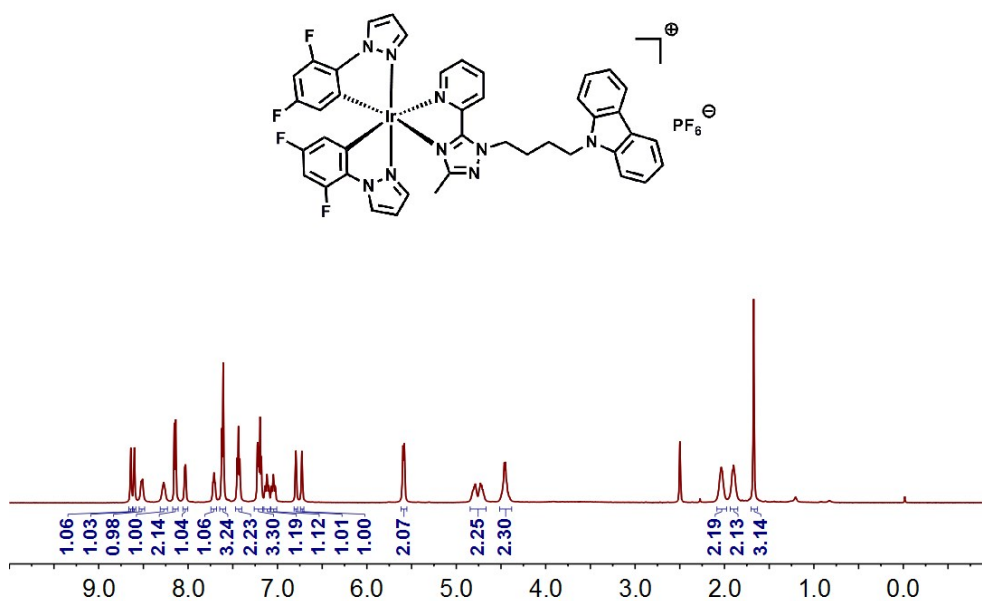

Fig. S2  $^1H$  NMR spectrum of **Ir-Cz** in  $DMSO-d_6$ .

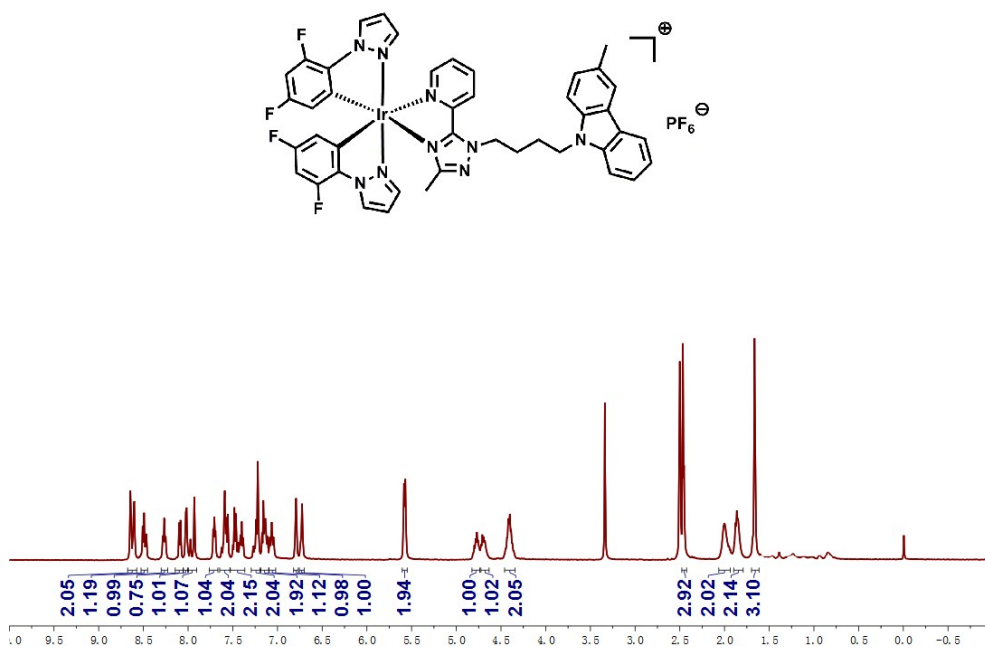

Fig. S3  $^1\text{H}$  NMR spectrum of **Ir-CzMe** in  $\text{DMSO-}d_6$ .

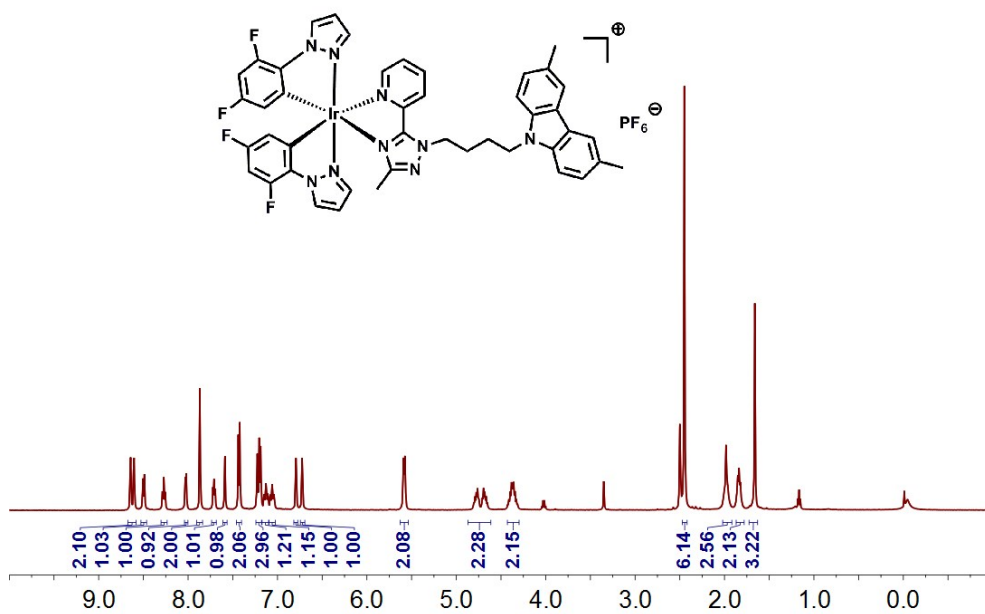

Fig. S4  $^1\text{H}$  NMR spectrum of **Ir-CzDMe** in  $\text{DMSO-}d_6$ .

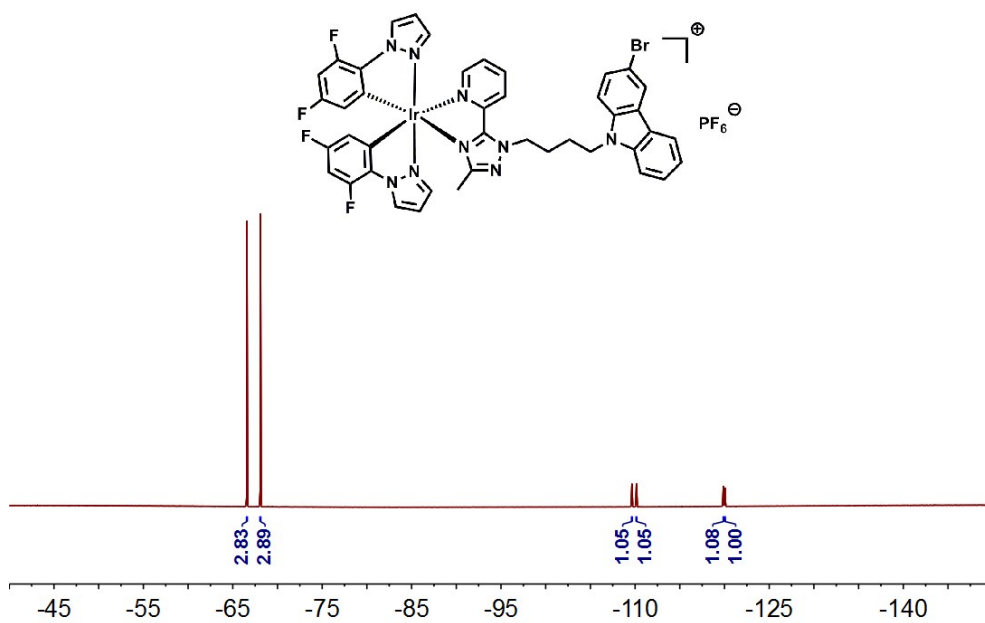

**Fig. S5**  $^{19}\text{F}$  NMR spectrum of **Ir-CzBr** in  $\text{DMSO-}d_6$ .

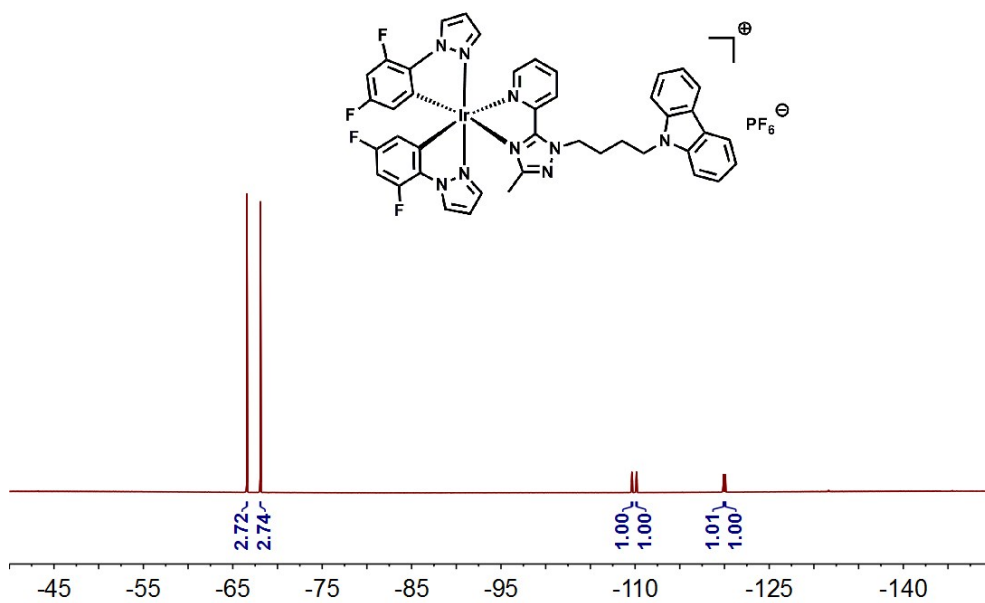

**Fig. S6**  $^{19}\text{F}$  NMR spectrum of **Ir-Cz** in  $\text{DMSO-}d_6$ .

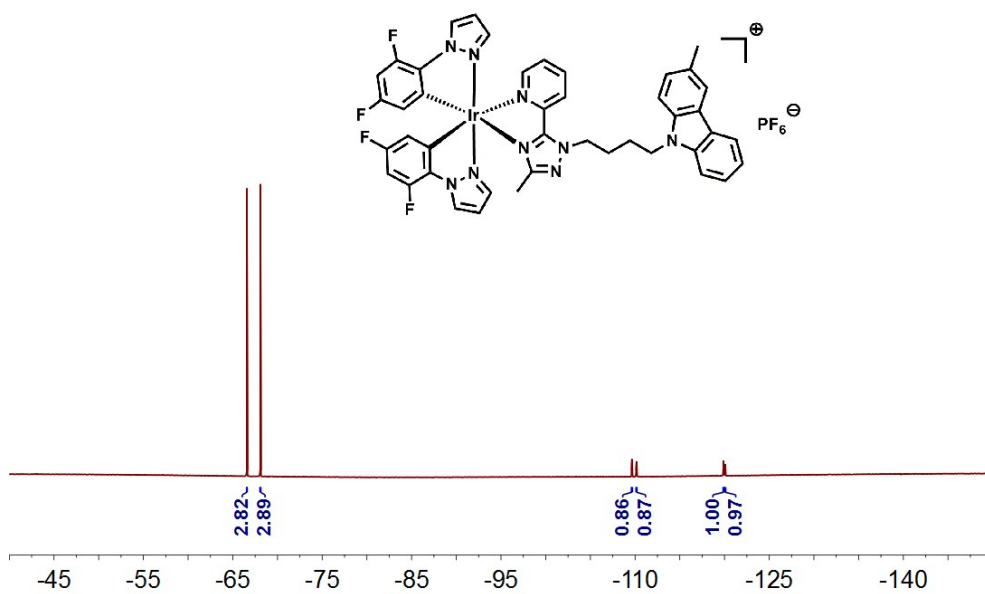

**Fig. S7**  $^{19}\text{F}$  NMR spectrum of **Ir-CzMe** in  $\text{DMSO-}d_6$ .

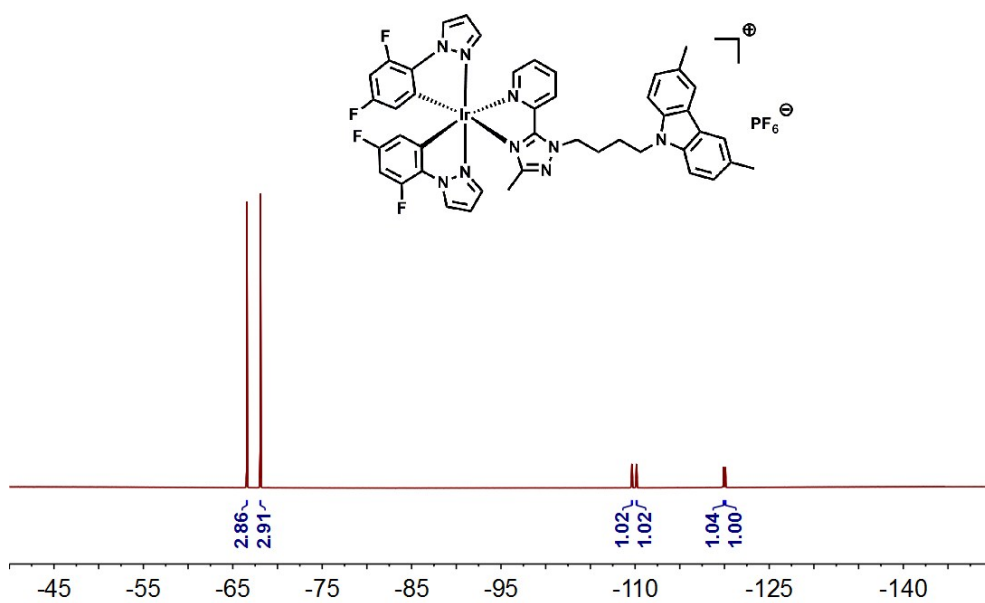

**Fig. S8**  $^{19}\text{F}$  NMR spectrum of **Ir-CzDMe** in  $\text{DMSO-}d_6$ .

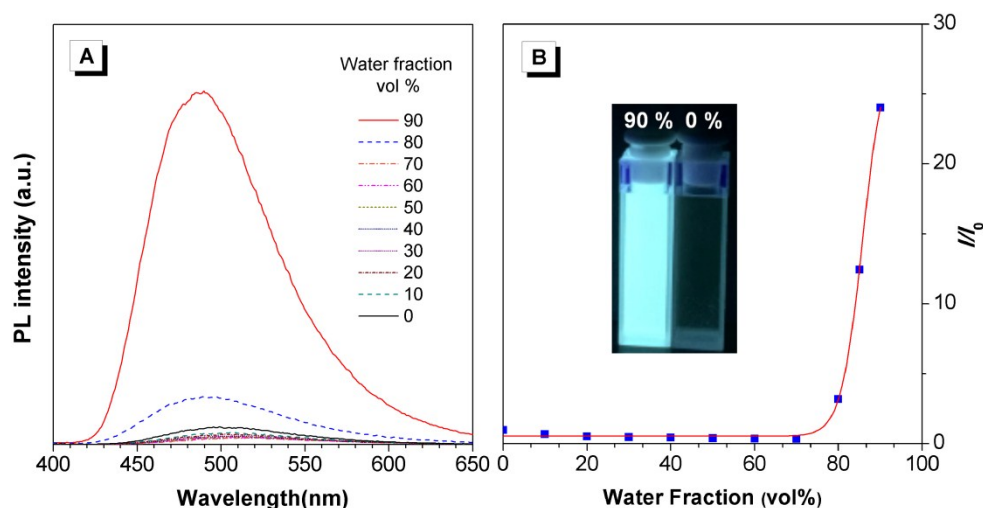

**Fig. S9** (a) Emission spectra of **Ir-Cz** in  $\text{CH}_3\text{CN-H}_2\text{O}$  mixtures with different  $\text{H}_2\text{O}$  fractions (0–90%) at room temperature. (b) Plot of relative PL intensity ( $I/I_0$ ) at 489 nm *versus* the composition of  $\text{CH}_3\text{CN-H}_2\text{O}$  mixture of **Ir-Cz**, where  $I_0$  = peak intensity in pure  $\text{CH}_3\text{CN}$ . Inset: photographs of **Ir-Cz** in pure  $\text{CH}_3\text{CN}$  solution and  $\text{CH}_3\text{CN-H}_2\text{O}$  mixture ( $f_w = 90\%$ ) under 365 nm UV illumination.

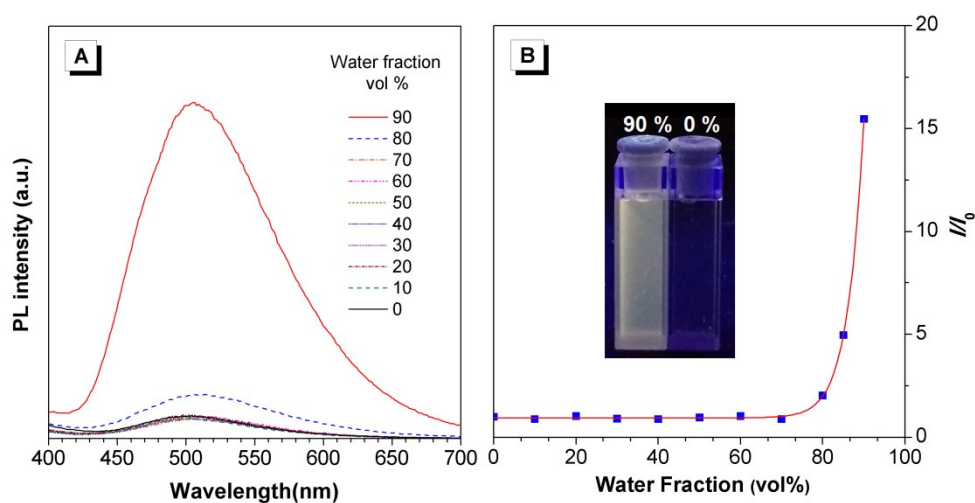

**Fig. S10** (a) Emission spectra of **Ir-CzMe** in  $\text{CH}_3\text{CN-H}_2\text{O}$  mixtures with different  $\text{H}_2\text{O}$  fractions (0–90%) at room temperature. (b) Plot of relative PL intensity ( $I/I_0$ ) at 508 nm *versus* the composition of  $\text{CH}_3\text{CN-H}_2\text{O}$  mixture of **Ir-CzMe**, where  $I_0$  = peak intensity in pure  $\text{CH}_3\text{CN}$ . Inset: photographs of **Ir-CzMe** in pure  $\text{CH}_3\text{CN}$  solution and  $\text{CH}_3\text{CN-H}_2\text{O}$  mixture ( $f_w = 90\%$ ) under 365 nm UV illumination.



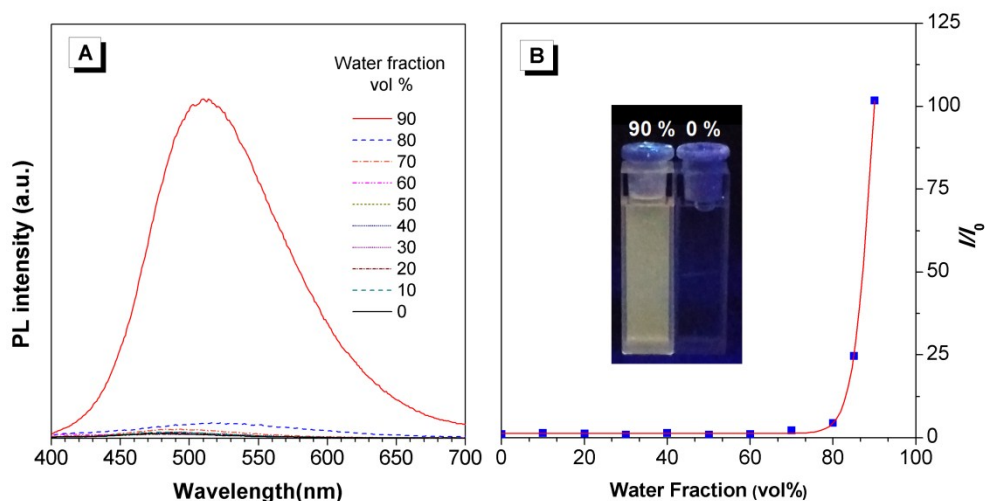

**Fig. S11** (a) Emission spectra of **Ir-CzDMe** in CH<sub>3</sub>CN-H<sub>2</sub>O mixtures with different H<sub>2</sub>O fractions (0–90%) at room temperature. (b) Plot of relative PL intensity ( $I/I_0$ ) at 513 nm *versus* the composition of CH<sub>3</sub>CN-H<sub>2</sub>O mixture of **Ir-CzDMe**, where  $I_0$  = peak intensity in pure CH<sub>3</sub>CN. Inset: photographs of **Ir-CzDMe** in pure CH<sub>3</sub>CN solution and CH<sub>3</sub>CN-H<sub>2</sub>O mixture ( $f_w = 90\%$ ) under 365 nm UV illumination.

**Table S1** Photophysical characteristics of **Ir-CzBr**, **Ir-Cz**, **Ir-CzMe** and **Ir-CzDMe**.

|                 | Solution                                                   | Solid                                                      | Neat film        |                       |
|-----------------|------------------------------------------------------------|------------------------------------------------------------|------------------|-----------------------|
|                 | $\lambda_{em}^a$ (nm), $\Phi_F^b$ (%), $\tau^c$ ( $\mu$ s) | $\lambda_{em}^a$ (nm), $\Phi_F^b$ (%), $\tau^c$ ( $\mu$ s) | $\alpha_{AIE}^d$ | $\lambda_{em}^a$ (nm) |
| <b>Ir-CzBr</b>  | 494, 1.0, 0.023                                            | 479, 33.3, 1.16                                            | 33.30            | 491                   |
| <b>Ir-Cz</b>    | 497, 0.5, 0.017                                            | 488, 23.8, 1.09                                            | 47.60            | 492                   |
| <b>Ir-CzMe</b>  | 503, 0.4, 0.028                                            | 498, 5.9, 1.20                                             | 14.75            | 510                   |
| <b>Ir-CzDMe</b> | 488, 0.4, 0.038                                            | 516, 8.4, 0.28                                             | 21.00            | 538                   |

<sup>a</sup>  $\lambda_{em}$ , emission maximum. <sup>b</sup>  $\Phi_F$ , photoluminescence quantum yield measured by an integrating sphere. <sup>c</sup>  $\tau$ , photoluminescence lifetime. <sup>d</sup>  $\alpha_{AIE} = \Phi_F(\text{solid}) / \Phi_F(\text{solution})$ .

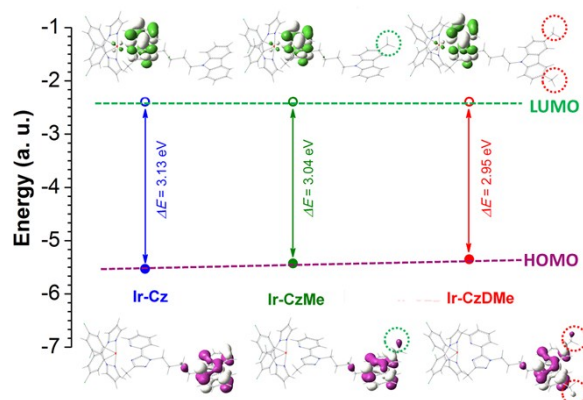

**Fig. S12** Molecular orbital amplitude plots and energy levels of **Ir-Cz**, **Ir-CzMe** and **Ir-CzDMe**.

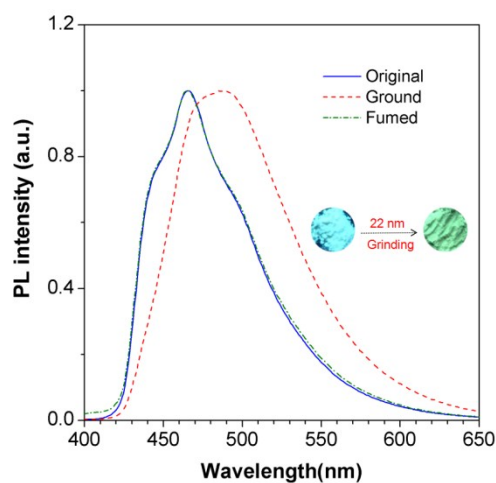

**Fig. S13** Emission spectra of **Ir-Cz** in various states at room temperature. Inset: the photographs of **Ir-Cz** in various states under 365 nm UV illumination.

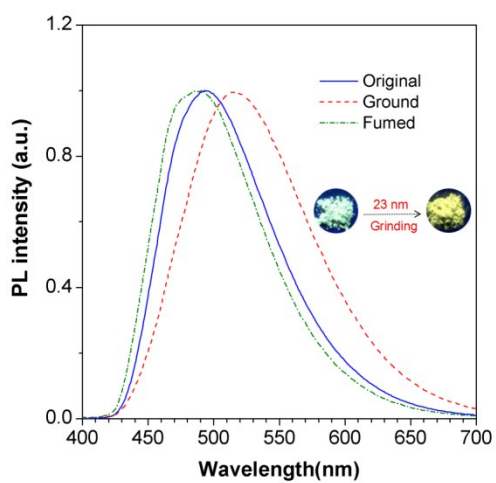

**Fig. S14** Emission spectra of **Ir-CzDMe** in various states at room temperature. Inset: the photographs of **Ir-CzDMe** in various states under 365 nm UV illumination.

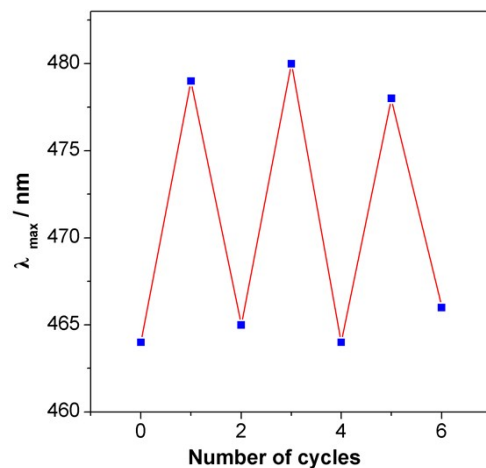

**Fig. S15** Maximum emission wavelength changes of **Ir-CzBr** versus repeating cycles.

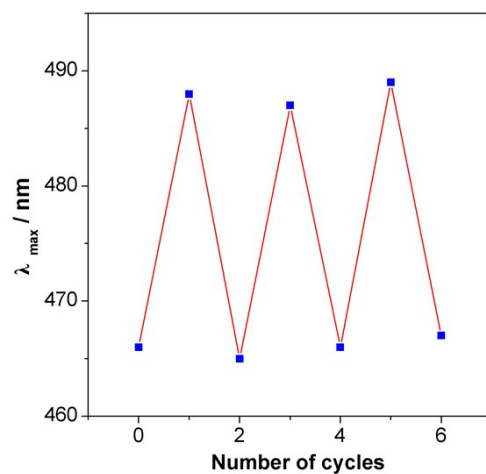

**Fig. S16** Maximum emission wavelength changes of **Ir-Cz** versus repeating cycles.

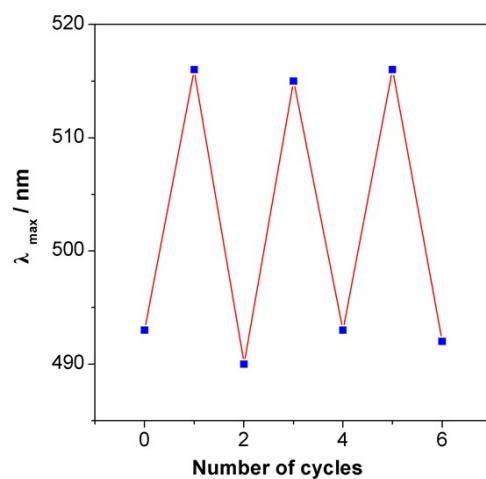

**Fig. S17** Maximum emission wavelength changes of **Ir-CzDMe** versus repeating cycles.

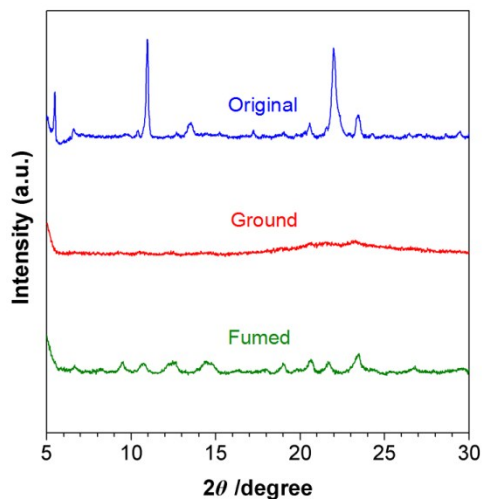

**Fig. S18** Powder X-ray diffraction patterns of **Ir-CzBr** in various states.

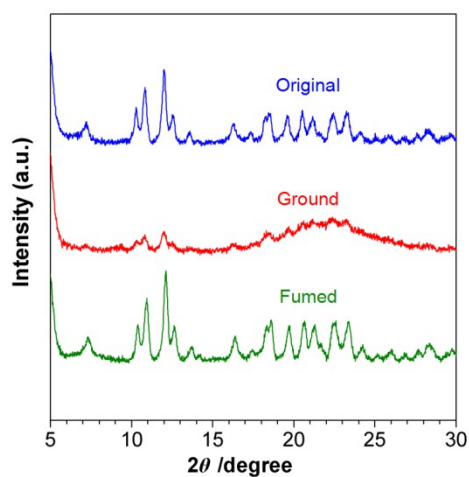

**Fig. S19** Powder X-ray diffraction patterns of **Ir-Cz** in various states.

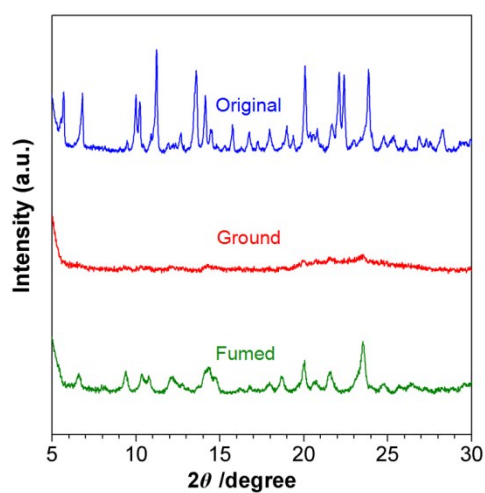

**Fig. S20** Powder X-ray diffraction patterns of **Ir-CzDMe** in various states.

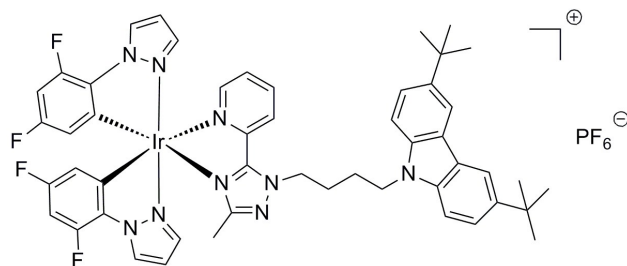

**Fig. S21** Chemical structure of **Ir-CztBut** reported in Ref. 2.

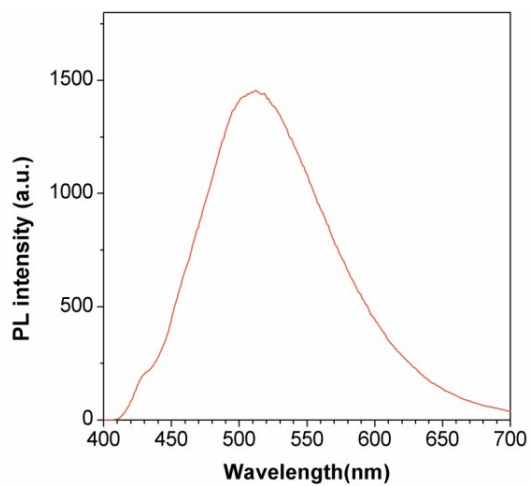

**Fig. S22** The emission spectrum of **Ir-CztBut** in powder at room temperature.

## References

1. K.-Y. Zhao, G.-G. Shan, Q. Fu and Z.-M. Su, *Organometallics*, 2016, **35**, 3996.
2. G.-G. Shan, H.-B. Li, H.-Z. Sun, D.-X. Zhu, H.-T. Cao and Z.-M. Su, *J. Mater. Chem. C*, 2013, **1**, 1440.
